# Supplementary material
Source: HighWire-hosted journal article supplement (https://bmjopenquality.bmj.com/highwire/filestream/135952/field_highwire_adjunct_files/0/ds3004.docx)
Supplement: ds3004.docx [file ds3004.docx]

| **TABLE 1: Handover Assessment** | |
| --- | --- |
| **Audit Criteria** | **Percentage of Handovers containing the relevant information at:**  **Baseline (n=105)** |
| A day the task was to be completed | 73% |
| A list of current problems / differential diagnoses | 47% |
| The patient’s relevant past medical history | 9% |
| The actual task to be completed | 95% |
| An indication for the task to be completed | 63% |
| The plan/action to be taken as a result of the task once completed | 43% |
| Whether junior doctors felt the handover was subjectively clear | 51% |

*Table 1: Audit results of handovers on the original electronic handover system. This illustrates the percentage of handovers that contained the information relevant to the corresponding pre-entered handover subheadings.*
